# Supplementary material for: The transcription factor ZEB1 regulates stem cell self-renewal and cell fate in the adult hippocampus
Source: PubMed Central journal article supplement (PMC8411115; doi:10.1016/j.celrep.2021.109588), 2021-08-24
Supplement: mmc1.pdf [file mmc1.pdf]

**Cell Reports, Volume 36**

**Supplemental information**

**The transcription factor ZEB1 regulates  
stem cell self-renewal and cell fate  
in the adult hippocampus**

**Bhavana Gupta, Adam C. Errington, Ana Jimenez-Pascual, Vasileios Eftychidis, Simone Brabletz, Marc P. Stemmler, Thomas Brabletz, David Petrik, and Florian A. Siebzehnrubl**

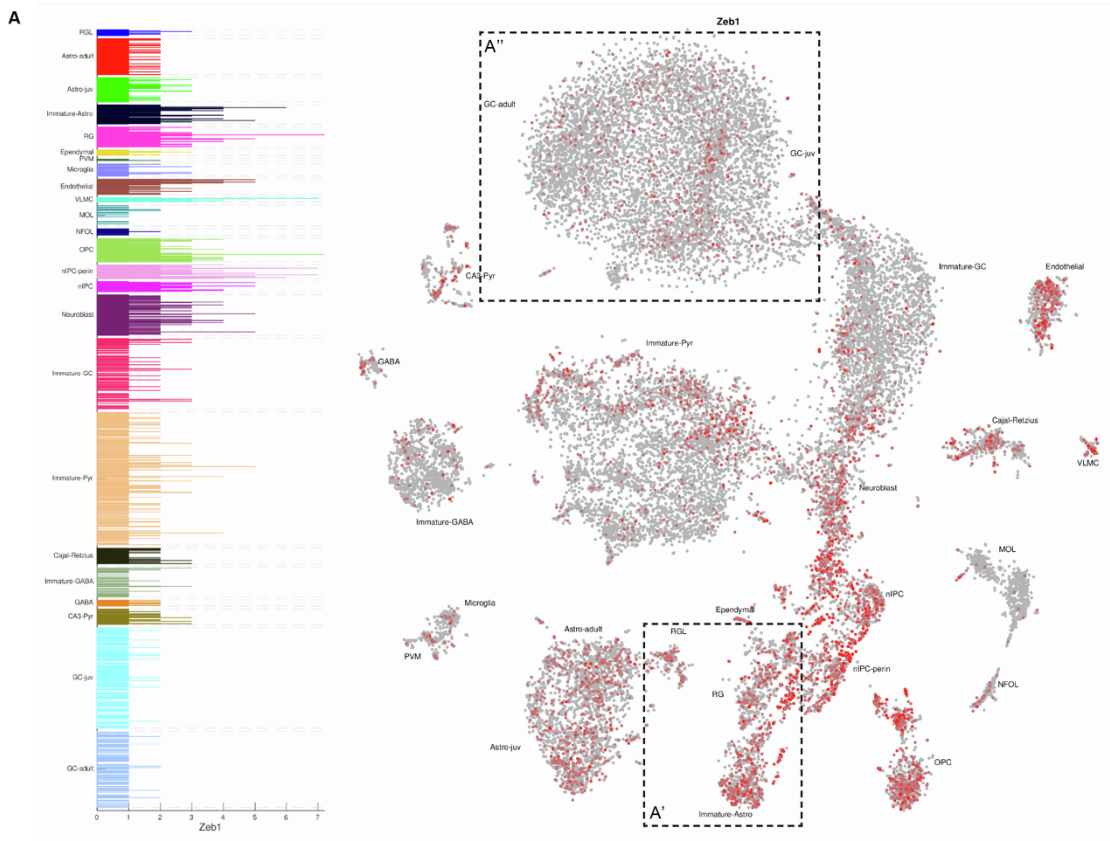

**Figure S1: Single-cell RNA-Sequencing data of *Zeb1* expression across hippocampal cell types. Related to Figure 1.** Depicted is data from Hochgerner et al. (Hochgerner et al., 2018) based on 10X Genomics sequencing. Boxed areas indicate RGL cell and immature astrocyte populations (**A'**) as well as hippocampal granule cells (**A''**).

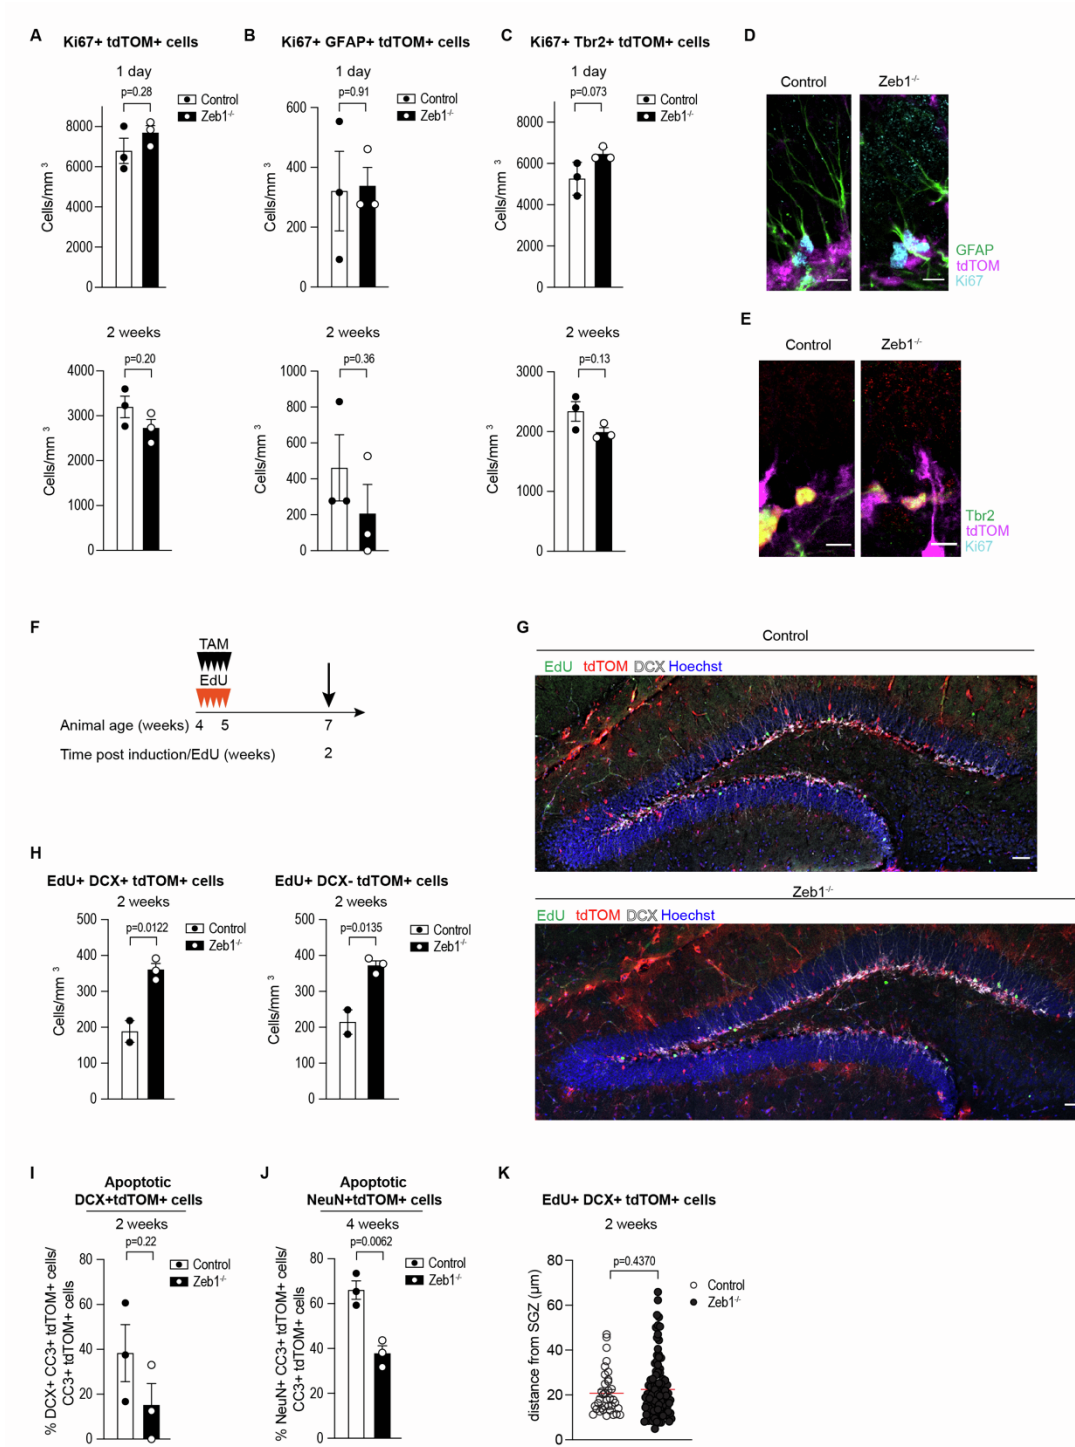

**Figure S2: *Zeb1* deletion does not result in slower proliferation rates but specifically increases neuronal survival. Related to Figure 4. (A)** Quantification of proliferating Ki67+ cells in control and *Zeb1*<sup>-/-</sup> mice. Both genotypes show no significant differences at 1 day or 2 weeks post induction. **(B)** Quantification of proliferating Ki67+GFAP+tdTOM+ RGL cells in control and *Zeb1*<sup>-/-</sup> mice. Both genotypes show no significant differences at 1 day or 2 weeks post induction. **(C)** Quantification of proliferating Ki67+Tbr2+tdTOM+ IPCs in control and *Zeb1*<sup>-/-</sup> mice. Both genotypes

show no significant differences at 1 day or 2 weeks post induction. **(D-E)** Representative images of Ki67+GFAP+tdTOM+ cells **(D)** and Ki67+Tbr2+tdTOM+ at 2 weeks post-induction **(E)**. Scale bars 10  $\mu$ m. **(F)** Schematic of EdU administration concurrent with tamoxifen; tissue harvesting was carried out at 2 weeks post-EdU injections. **(G)** Representative images of hippocampi stained for EdU, DCX and tdTOM. Scale bars 100  $\mu$ m. **(H)** Quantification of EdU+ cells showed a significant increase of both EdU+tdTOM+DCX+ (left) and EdU+tdTOM+DCX- (right) cells 2 weeks after EdU injection. **(I)** Quantification of the fraction of apoptotic CC3+ neuroblasts (DCX+) showed no difference between the genotypes. **(J)** Quantification of the fraction of apoptotic CC3+ neurons (NeuN+) demonstrated a decrease in the number of apoptotic neurons in the *Zeb1*<sup>-/-</sup> mice in comparison to controls at 4 weeks post-induction. **(K)** Distances of EdU+tdTOM+DCX+ neuroblasts from the SGZ show no significant differences in migration of newborn neuroblasts between genotypes. Dots represent individual animals, except in K where dots represent individual cells.

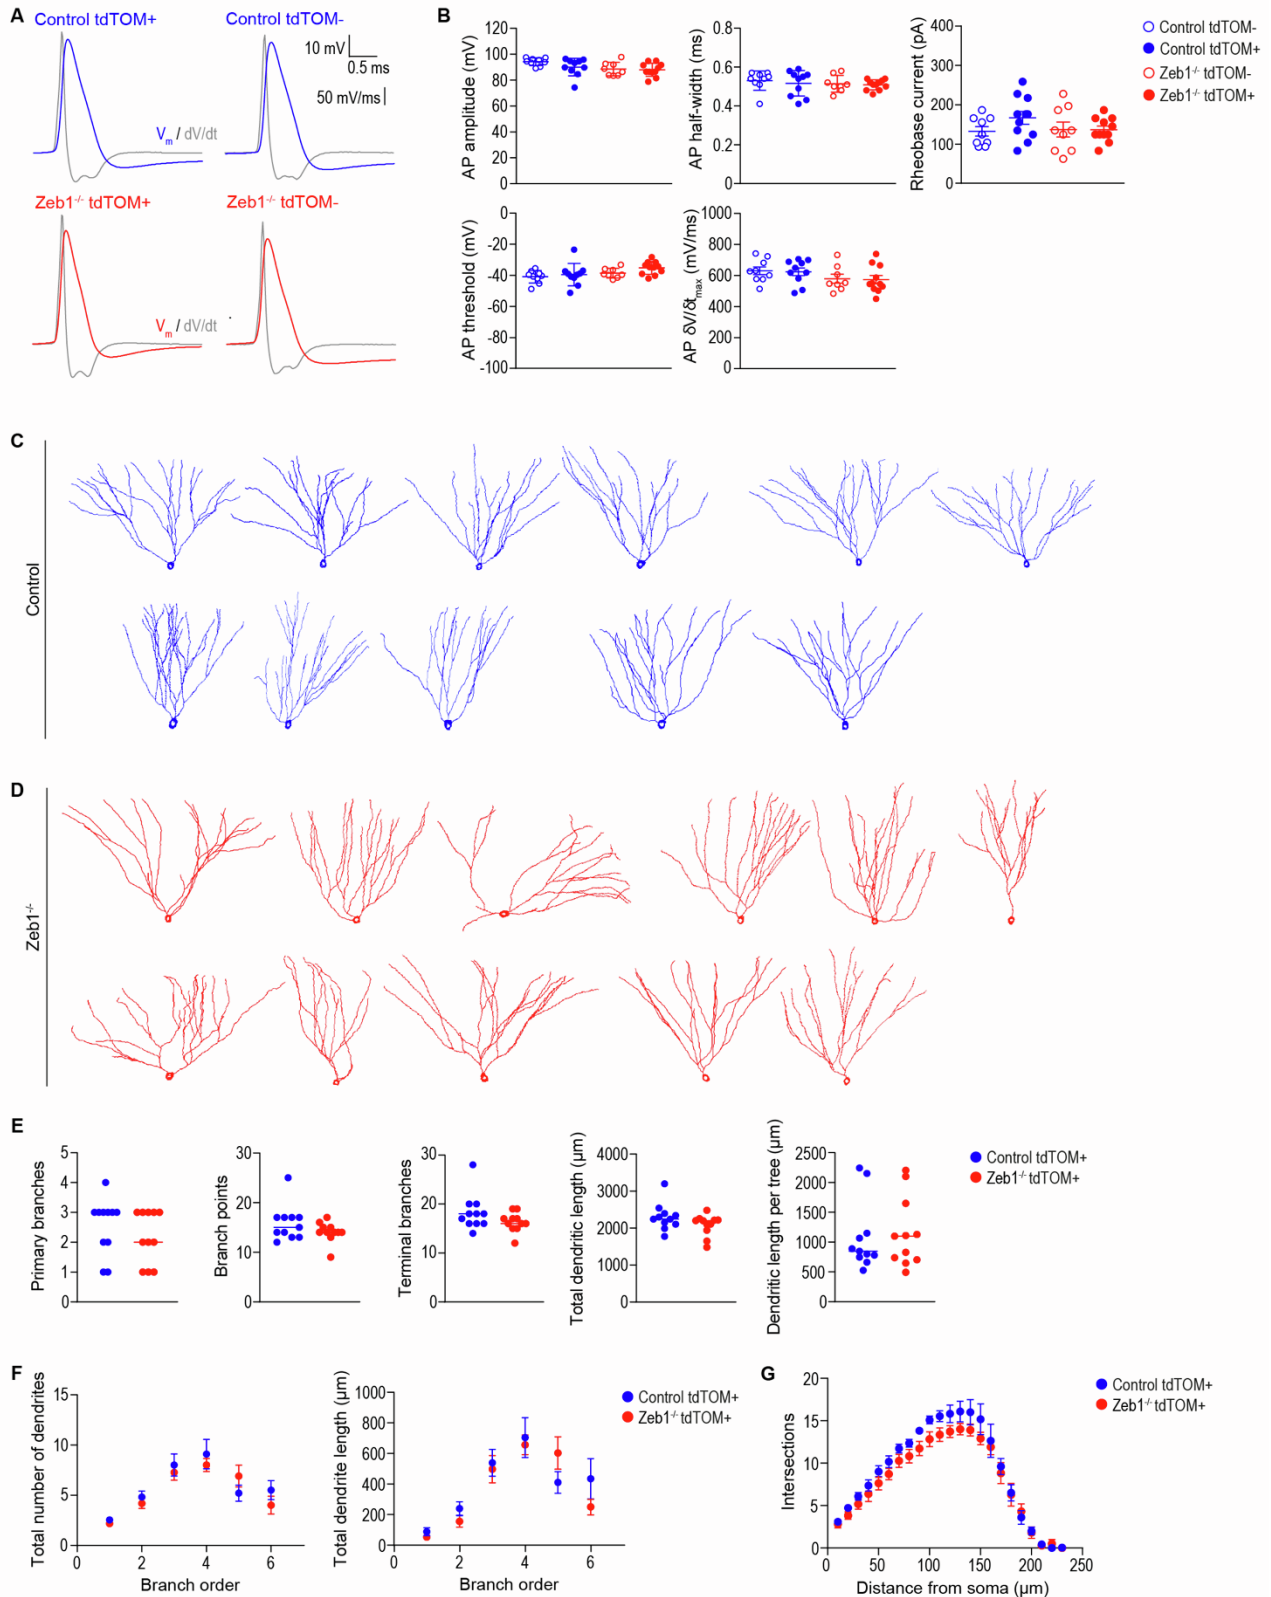

**Figure S3: Patch-clamp electrophysiology of control and *Zeb1*<sup>-/-</sup> neurons. Related to Figure 4.**

**(A)** Traces showing evoked action potentials, in tdTOM+ and tdTOM-, control (blue) and *Zeb1*<sup>-/-</sup> (red) DGGCs. Grey traces show the first temporal derivative ( $\delta V / \delta t$ ) of the action potential. **(B)** Scatter

plots showing action potential amplitude, half width, voltage threshold,  $\delta V/\delta t$  and rheobase current for individual DGGCs overlaid with the mean and SEM value for each group. **(C-D)** 2D projections of reconstructed DGGCs from control **(C)** and *Zeb1*<sup>-/-</sup> mice **(D)**, n = 11 each). **(E-F)** Plots of the mean number of dendrites and mean total dendritic length by branch order in control and *Zeb1*<sup>-/-</sup> DGGCs. **(G)** Sholl plot of the number of dendritic intersections against distance from the soma. Dots represent individual neurons in B and E, and averages in F and G.

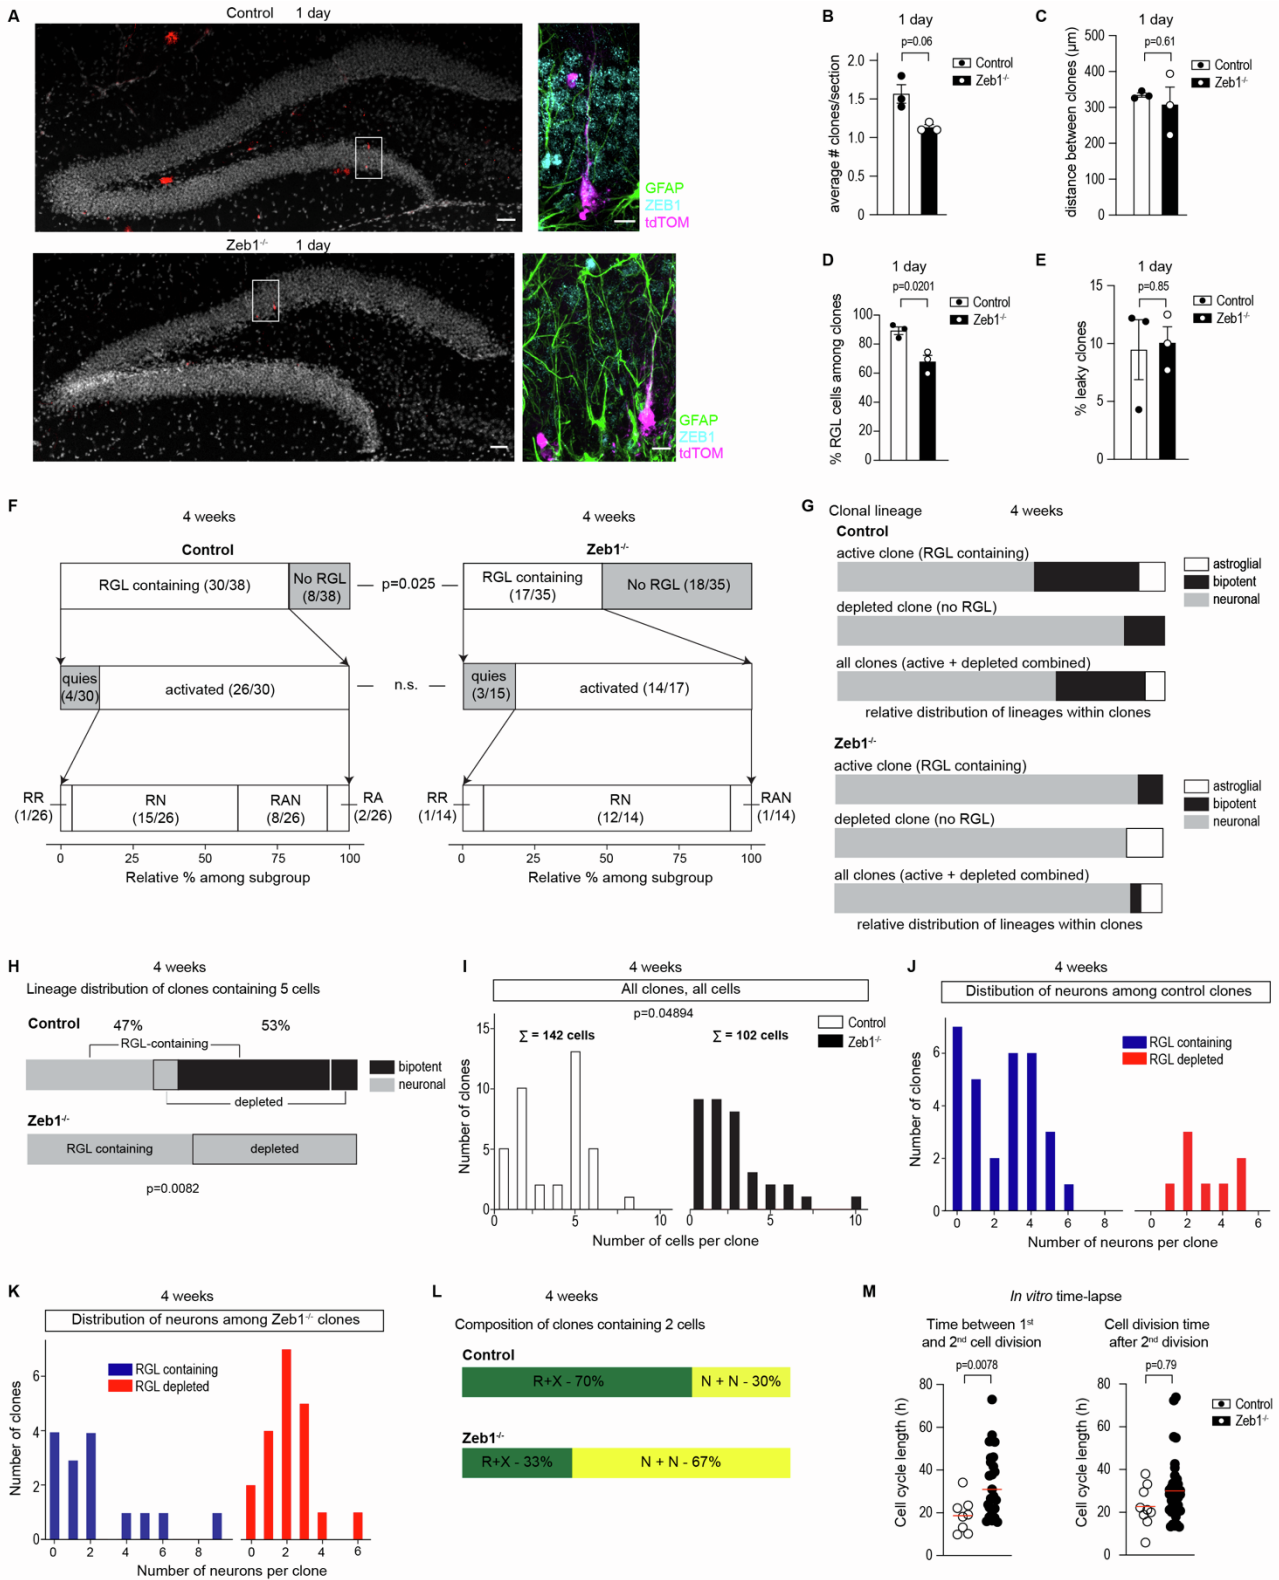

**Figure S4: Additional data from clonal analysis. Related to Figure 6. (A)** Representative images of hippocampi 1 day after administration of low-dose tamoxifen. Insets show recombination of tdTOM in RGL cells (ZEB1<sup>+</sup> in control, ZEB1<sup>-</sup> in *Zeb1*<sup>-/-</sup>). Note the presence of the tdTOM<sup>+</sup> IPC in proximity

to the RGL cell in *Zeb1*<sup>-/-</sup>. Recombined clones in *Zeb1*<sup>-/-</sup> mice displayed evidence of accelerated proliferation compared to controls (see also D). Scale bars 100 μm (10 μm in insets). **(B)** Quantification of recombined clones per section 1 day after induction shows no difference between genotypes. **(C)** Average distance between recombined clones (where there was more than 1 clone per section) shows no difference between genotypes. **(D)** Quantification of numbers of RGL cells per clone shows a significant decrease in *Zeb1*<sup>-/-</sup> mice compared to controls at 1 day post induction. **(E)** Quantification of leaky clones (containing >4 cells at 1 day post induction) shows no difference between genotypes. **(F)** Comparison of clonal distribution shows significantly fewer active (RGL cell-containing) clones in *Zeb1*<sup>-/-</sup> mice. Among RGL-containing (active) clones, there is no difference in the ratio of quiescent (containing only a single RGL cell) to activated (containing an RGL cell and any other cell) clones. Lineage distribution of progenies in activated clones showed a profound loss of astroglial cells in *Zeb1*<sup>-/-</sup> clones (R: RGL cell; RR: self-renewing clone containing 2 RGL cells; RN: clone containing RGL cell and neuronal progenies; RA: clone containing RGL cell and astroglial progenies; RAN: clone containing RGL cell, neuronal and astroglial progenies). **(G)** Comparison of lineage distribution across active, depleted and all clones highlights increase in neuron-producing and decrease in astrocyte-producing clones in *Zeb1*<sup>-/-</sup> mice. No difference was found between the percentages of neuronal lineage producing depleted clones, but these were far fewer in total numbers in control mice. **(H)** Comparison of lineage distribution across clones containing 5 cells. In controls, 53% of 5-cell clones are bipotent (producing neuronal and astroglial progenies), whereas in *Zeb1*<sup>-/-</sup> mice all 5-cell clones were committed to the neuronal lineage. In controls, the majority of 5-cell clones contained an RGL cell, but in *Zeb1*<sup>-/-</sup> mice the number of active and depleted 5-cell clones was approximately even. **(I)** Total number of cells per clone was significantly lower in *Zeb1*<sup>-/-</sup> clones compared to controls. Note the different distribution of cells among clones between controls (peaks at clones containing either 2 or 5 cells) and *Zeb1*<sup>-/-</sup> mice (left shift towards clones containing 1-3 cells). **(J,K)** Histograms showing distribution of neurons between RGL-containing and RGL-depleted clones for control **(J)** and *Zeb1*<sup>-/-</sup> mice **(K)**. In controls, most clones contain an RGL cell with peaks at 1 and 4 neurons (corresponding to peaks at 2 and 5 cells in panel D), whereas most *Zeb1*<sup>-/-</sup> clones lack an RGL cell with a single peak around 2 neurons. **(L)** Comparison of lineage distribution across clones containing 2 cells. In control mice, most 2-cell clones are activated,



whereas in *Zeb1*<sup>-/-</sup> mice the majority of 2-cell clones is depleted and contains neurons. **(M)**  
Quantification of cell division times between first and second division (left) and all subsequent divisions (right) from time-lapse imaging. Red line represents median. Dots represent individual animals in B-E and individual clones in M.

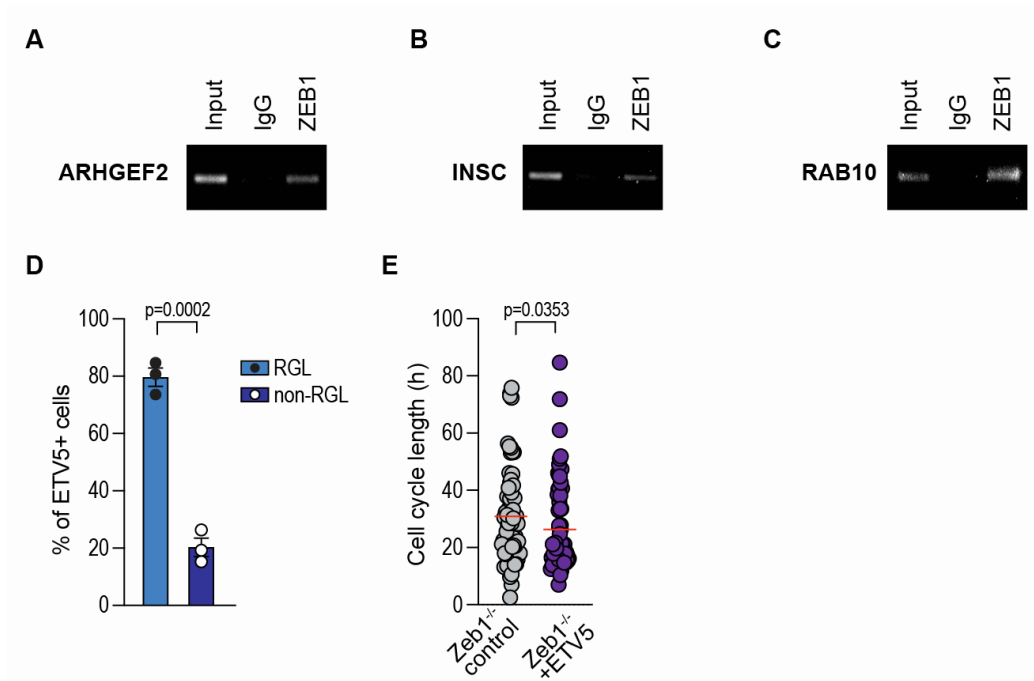

**Figure S5: ChIP data for promoter occupancy of ZEB1. Related to Figure 7. (A-C)** ChIP-PCR demonstrated ZEB1 binding to the promoter regions of ARHGEF2 (A), INSC (B) and RAB10 (C). (D) Quantification of ETV5 expression across cell types in the SGZ shows that the majority of ETV5 expressing cells are RGL cells, with a small fraction of non-RGL ETV5+ cells. (E) Quantification of cell cycle length in *Zeb1*<sup>-/-</sup> control and ETV5-transduced clones. Red line represents median. Dots represent individual animals in D and individual cells in E.

**Table S1: Candidate regulators of asymmetric cell division. Candidates included in further analyses are highlighted. Related to Figure 7.**

| Candidate gene name                      | ACTR2  | ACTR3  | ARHGGEF2       | ASPM    | DOCK7            | ETV5                  | FGF13  | GOLGA2        | HOXC4 | ING2  | INSC       | PARD3   | PAX6                         | POU5F1 | RAB10           | RGS14           | SOX5          | STRA8 | TEAD3 | WNT9B | ZBTB16 |               |
|------------------------------------------|--------|--------|----------------|---------|------------------|-----------------------|--------|---------------|-------|-------|------------|---------|------------------------------|--------|-----------------|-----------------|---------------|-------|-------|-------|--------|---------------|
| ZEB1 bound in GBM ChIP-Seq?              |        | ♦      | ♦              |         |                  | ♦                     |        |               | ♦     | ♦     | ♦          | ♦       |                              |        | ♦               |                 | ♦             |       |       |       |        |               |
| Expression in HC cell types (1)          | neuron | neuron | IPC/<br>neuron | IPC     | astro,<br>neuron | RGL,<br>astro,<br>OPC | neuron | broad         |       | broad | neuroblast | broad   | RGL,<br>astro,<br>neuroblast |        | broad           | granule<br>cell | broad         |       |       |       | Neuron |               |
| Expression in astrocytes (2)             |        |        |                | ♦ (STR) |                  | ♦ (HC)                |        |               |       |       | ♦ (STR)    | ♦ (STR) | ♦ (HC)                       |        |                 |                 |               |       |       |       |        | ♦ (HC)        |
| Cell types showing overlap with ZEB1 (3) | oligo  | oligo  | astro/OPC      |         | oligo            | astro/OPC             | oligo  | astro/<br>OPC |       | oligo | astro      | astro   | astro                        |        | astro/<br>oligo | oligo           | astro/<br>OPC |       |       |       |        | astro/<br>OPC |

(1) Hochgermer et al. Nat Neurosci 2018 DOI: 10.1038/s41593-017-00562-2

(2) Chai et al. Neuron 2017 DOI: 10.1016/j.neuron.2017.06.029

(3) Zeisel et al. Science 2015 DOI: 10.1126/science.aaa1934

**Acronyms:**

astro = astrocyte  
 GBM = glioblastoma  
 HC = hippocampus  
 IPC = intermediate progenitor cell  
 oligo = oligodendrocyte  
 OPC = oligodendrocyte precursor cell  
 RGL = radial glia like cell  
 STR = striatum

**Table S2: Criteria for identifying cell types in the DG. Related to STAR Methods sections ‘Tissue processing, immunostaining, and confocal imaging’ and ‘Clonal analysis’.**

| <b>Cell population</b>      | <b>Markers</b>     | <b>Localization/Morphological features</b>                                                   |
|-----------------------------|--------------------|----------------------------------------------------------------------------------------------|
| RGL cell                    | GFAP               | SGZ-localized soma, a radial projection spanning the GCL and branching in ML                 |
| Activated RGL, early IPC    | MCM2               | SGZ-localized, either GFAP+ RGL cell-like morphology or spherical morphology and GFAP- (IPC) |
| Proliferating IPC           | Ki67               | SGZ-localized, spherical                                                                     |
| Late IPC                    | TBR2               | SGZ-localized, spherical with some short processes                                           |
| Neuroblast, immature neuron | DCX                | SGZ and lower GL-localized, short process extending towards upper GCL                        |
| Mature neuron               | NeuN               | Pan-DG localization with a projection branching in the ML                                    |
| Astrocyte                   | GFAP, S100 $\beta$ | SGZ, hilus, and ML-localized with a stellate morphology                                      |

**Table S3: Oligonucleotide information, related to STAR Methods.**

| <b>Reagent or Resource</b> | <b>Source</b> | <b>Identifier</b>     |
|----------------------------|---------------|-----------------------|
| ARHGEF fwd #1 (ChIP)       | Sigma-Aldrich | TCTGGCTTGTGTGGCTGAAA  |
| ARHGEF rev #1 (ChIP)       | Sigma-Aldrich | TCACAAATCAGAGCCCGGTT  |
| ARHGEF fwd #2 (ChIP)       | Sigma-Aldrich | GTCTGTGTGGGCAAAACACG  |
| ARHGEF rev #2 (ChIP)       | Sigma-Aldrich | AGCTAATCCCAACTGGAGCC  |
| ETV5 fwd #1 (ChIP)         | Sigma-Aldrich | ATTCAGGCAAGAGGGGGAGT  |
| ETV5 rev #1 (ChIP)         | Sigma-Aldrich | ACAACATACTGGGCGAGCCA  |
| ETV5 fwd #2 (ChIP)         | Sigma-Aldrich | TGCACAATGGGGTCTGGTTA  |
| ETV5 rev #2 (ChIP)         | Sigma-Aldrich | CCCCTCTTGCCTGAATGGTG  |
| INSC fwd #1 (ChIP)         | Sigma-Aldrich | TCCAGAGAGTACAGGCCACA  |
| INSC rev #1 (ChIP)         | Sigma-Aldrich | TCACCAATACCACGCCAGAG  |
| INSC fwd #2 (ChIP)         | Sigma-Aldrich | GAAGCACATGCTGATCTGTGG |
| INSC rev #2 (ChIP)         | Sigma-Aldrich | AGGAAGCCGCCTCACCAATA  |
| PARD3 fwd #1 (ChIP)        | Sigma-Aldrich | GAGCTCCACCTGCCTTTGAC  |
| PARD3 rev #1 (ChIP)        | Sigma-Aldrich | AAAGAAGTTGTGCCTGGCTTG |
| RAB10 fwd #1 (ChIP)        | Sigma-Aldrich | GGCCTCCTGATTGGGTGAG   |
| RAB10 rev #1 (ChIP)        | Sigma-Aldrich | CTATACGGACGTAGTGCGCC  |
| RAB10 fwd #2 (ChIP)        | Sigma-Aldrich | AGAGCCACCTTTTTCCCCGT  |
| RAB10 rev #2 (ChIP)        | Sigma-Aldrich | GGTGTACGTCCTTGCGTGC   |
| SOX5 fwd #1 (ChIP)         | Sigma-Aldrich | AGCGAAGTGGAGCTATGACA  |
| SOX5 rev #1 (ChIP)         | Sigma-Aldrich | GAGCGCTCTCAGCAGTAAGT  |
| SOX5 fwd #2 (ChIP)         | Sigma-Aldrich | TGGAGCTATGACATCCCACAT |
| SOX5 rev #2 (ChIP)         | Sigma-Aldrich | AGCGCTCTCAGCAGTAAGTA  |
